# Supplementary material for: In situ precise determination of stable Mo isotope ratios in molybdenite by femtosecond LA-MC-ICP-MS
Source: Royal Society of Chemistry journal article supplement (doi:10.1039/d4ja00145a), 2024-01-01
Supplement: d4ja00145a1.xlsx [file d4ja00145a1.xlsx]

## Sheet: Sheet1
SN-MC-ICP-MS results
SampleName	97Mo/95Mo	StdErr	98Mo/95Mo	StdErr	91/90Zr	StdErr		δ97MoNIST SRM 3134	2SD	δ98MoNIST SRM 3134	2SD
NIST3134	0.602658	9.82006e-06	1.52697	3.37765e-05	0.223178	1.59853e-06
GD-1	0.602583	1.14878e-05	1.52674	3.3636e-05	0.223177	1.9006e-06		-0.125683		-0.165254
NIST3134	0.60266	9.84738e-06	1.52701	2.80771e-05	0.223169	1.4067e-06
GD-1	0.602564	8.97241e-06	1.52663	2.62188e-05	0.223174	1.29133e-06		-0.138985		-0.226296
NIST3134	0.602636	1.01549e-05	1.52694	3.01207e-05	0.223172	1.31638e-06
GD-1	0.602565	9.44842e-06	1.52663	2.7809e-05	0.223175	1.29719e-06		-0.125048		-0.19237
NIST3134	0.602644	8.53254e-06	1.52691	2.86956e-05	0.223173	1.48105e-06
GD-1	0.602565	1.21469e-05	1.52665	3.6362e-05	0.223174	1.5763e-06		-0.149001		-0.194725
NIST3134	0.602665	1.09644e-05	1.52699	3.01689e-05	0.22317	1.20337e-06		-0.134679	0.0230171	-0.194661	0.0499442
NIST3134	0.602671	7.71906e-06	1.52701	3.40382e-05	0.223161	1.57492e-06
GD-1	0.602593	1.09108e-05	1.52673	3.11623e-05	0.223162	1.76328e-06		-0.117383		-0.15228
NIST3134	0.602655	1.06369e-05	1.52693	3.46085e-05	0.223168	1.80672e-06
GD-1	0.602589	9.2961e-06	1.52671	3.15318e-05	0.223165	1.8958e-06		-0.125965		-0.162873
NIST3134	0.602674	9.55136e-06	1.52698	2.53456e-05	0.22317	1.28841e-06
GD-1	0.602569	8.50355e-06	1.52665	2.76452e-05	0.223176	1.59859e-06		-0.145364		-0.191819
NIST3134	0.60264	8.4712e-06	1.52691	3.31388e-05	0.223175	1.68957e-06
GD-1	0.602587	1.01714e-05	1.52672	3.30988e-05	0.223174	1.38656e-06		-0.0972057		-0.146701
NIST3134	0.602651	1.13284e-05	1.52698	3.45905e-05	0.223177	1.64962e-06		-0.121479	0.0399427	-0.163418	0.0401732
								-0.128079	0.0300333	-0.17904	0.0495381
NIST3134	0.602428	7.31137e-06	1.52593	2.58895e-05	0.222448	2.13561e-06
GD-2	0.602334	6.41762e-06	1.52558	1.67697e-05	0.222463	1.31935e-06		-0.144972		-0.218322
NIST3134	0.602415	6.85517e-06	1.5259	2.21592e-05	0.222455	2.10984e-06
GD-2	0.602334	6.66788e-06	1.52558	2.29556e-05	0.222426	2.27237e-06		-0.157361		-0.233602
NIST3134	0.602443	8.3118e-06	1.52597	2.41016e-05	0.222447	1.36022e-06
GD-2	0.602337	6.39281e-06	1.5256	2.36853e-05	0.222457	1.40361e-06		-0.176505		-0.24882
NIST3134	0.602444	9.63843e-06	1.52599	2.98346e-05	0.222456	2.10807e-06
GD-2	0.602352	5.27178e-06	1.52564	1.92187e-05	0.222457	1.27199e-06		-0.152622		-0.228317
NIST3134	0.602443	7.15875e-06	1.52599	2.29844e-05	0.222465	1.35591e-06
								-0.157865	0.0268678	-0.232265	0.0254517
NIST3134	0.602643	7.03491e-06	1.52692	2.69581e-05	0.22317	1.12599e-06
YN-1	0.602768	9.36985e-06	1.52746	3.65014e-05	0.223175	1.71378e-06		0.224772		0.366508
NIST3134	0.602621	7.68386e-06	1.52689	2.78407e-05	0.223176	1.3813e-06
YN-1	0.602785	8.631e-06	1.52748	3.22859e-05	0.223173	1.65415e-06		0.243167		0.359044
NIST3134	0.602656	1.12684e-05	1.52698	3.6096e-05	0.223171	2.02307e-06
YN-1	0.60281	1.00062e-05	1.52757	3.18457e-05	0.223173	1.45554e-06		0.267752		0.383811
NIST3134	0.60264	9.22424e-06	1.52698	3.15942e-05	0.223172	1.36162e-06
YN-1	0.602783	9.78734e-06	1.52752	3.47894e-05	0.223175	1.75858e-06		0.230256		0.356208
NIST3134	0.602648	8.39618e-06	1.52696	2.92957e-05	0.22317	1.61537e-06		0.241487	0.038266	0.366393	0.0247962
YN-1	0.602773	7.15041e-06	1.52744	2.29442e-05	0.223163	1.32885e-06		0.213867		0.310679
NIST3134	0.602639	8.88397e-06	1.52697	2.593e-05	0.223165	1.49742e-06
YN-1	0.602767	8.31053e-06	1.5274	3.08931e-05	0.223154	1.44403e-06		0.212726		0.295993
NIST3134	0.602638	8.94064e-06	1.52693	2.79701e-05	0.223161	1.62715e-06
YN-1	0.602762	8.80131e-06	1.52741	3.10667e-05	0.223156	1.6922e-06		0.216387		0.316087
NIST3134	0.602625	8.8002e-06	1.52691	2.50832e-05	0.223157	1.30867e-06
YN-1	0.602749	8.75037e-06	1.52739	2.60342e-05	0.223158	1.16044e-06		0.181402		0.296058
NIST3134	0.602654	7.25258e-06	1.52697	2.61986e-05	0.223154	1.2695e-06		0.206096	0.0330659	0.304704	0.0205238
								0.223791	0.0473736	0.335548	0.0676291
NIST3134	0.602449	7.42166e-06	1.52601	2.43913e-05	0.22247	1.36883e-06
YN-2	0.602297	7.13405e-06	1.52545	2.26667e-05	0.222473	1.57391e-06		-0.240235		-0.351709
NIST3134	0.602435	6.59523e-06	1.52596	2.79852e-05	0.222472	1.81261e-06
YN-2	0.602291	6.76257e-06	1.52544	2.26853e-05	0.222476	1.65496e-06		-0.220336		-0.32488
NIST3134	0.602413	8.38623e-06	1.52591	3.03754e-05	0.222463	1.83746e-06
YN-2	0.602275	5.58536e-06	1.52537	1.85543e-05	0.222471	2.12556e-06		-0.263417		-0.394569
NIST3134	0.602455	7.5716e-06	1.52602	2.13656e-05	0.222472	1.66469e-06
YN-2	0.602292	5.93776e-06	1.52542	2.15839e-05	0.222479	1.52729e-06		-0.257299		-0.384391
NIST3134	0.602438	7.60281e-06	1.526	2.63777e-05	0.222478	1.41487e-06
								-0.245322	0.0386621	-0.363887	0.0635785
NIST3134	0.602459	8.97829e-06	1.52607	3.18339e-05	0.222509	1.41504e-06
YN-3	0.602477	1.01831e-05	1.52617	3.23984e-05	0.222516	1.25553e-06		0.0285967		0.0724587
NIST3134	0.60246	1.07236e-05	1.52606	3.46283e-05	0.222512	1.64999e-06
YN-3	0.602503	7.68529e-06	1.52618	2.77222e-05	0.222514	1.66318e-06		0.0772841		0.0636787
NIST3134	0.602453	8.93199e-06	1.5261	2.77888e-05	0.222513	1.66025e-06
YN-3	0.602496	1.02892e-05	1.52622	2.74436e-05	0.222513	1.45852e-06		0.060036		0.0833988
NIST3134	0.602467	8.98253e-06	1.52609	2.57392e-05	0.222516	1.42112e-06
YN-3	0.60248	9.06242e-06	1.52615	2.93358e-05	0.222519	1.47662e-06		0.0329622		0.0518237
NIST3134	0.602454	9.25528e-06	1.52606	3.40184e-05	0.222513	1.56659e-06
								0.0497197	0.04609	0.06784	0.0267643
NIST3134	0.602653	9.99477e-06	1.52696	3.5644e-05	0.223186	1.71431e-06
SX-1	0.602776	8.76194e-06	1.52744	2.84513e-05	0.223181	1.45065e-06		0.213341		0.3291
NIST3134	0.602642	8.34433e-06	1.52691	2.60091e-05	0.223183	1.35779e-06
SX-1	0.602767	9.0899e-06	1.52743	2.73417e-05	0.223184	1.4576e-06		0.21619		0.341192
NIST3134	0.602632	9.75348e-06	1.52691	3.37388e-05	0.223185	1.73079e-06
SX-1	0.602774	8.13399e-06	1.52741	3.1477e-05	0.223176	1.84037e-06		0.231242		0.323654
NIST3134	0.602637	1.00541e-05	1.52692	2.88185e-05	0.223182	1.25306e-06		0.220258	0.0192379	0.331315	0.017953
SX-1	0.602773	9.66301e-06	1.52744	3.00323e-05	0.223186	1.59091e-06		0.223575		0.344575
NIST3134	0.60264	1.27616e-05	1.52691	3.7078e-05	0.223188	1.8784e-06
SX-1	0.602788	8.88021e-06	1.52746	3.42919e-05	0.223187	1.61419e-06		0.253414		0.352205
NIST3134	0.60263	9.20769e-06	1.52693	2.76906e-05	0.223184	1.20807e-06
SX-1	0.602772	8.82725e-06	1.52744	3.55769e-05	0.223188	1.7935e-06		0.225768		0.333827
NIST3134	0.602643	8.36621e-06	1.52693	2.78655e-05	0.223185	1.3699e-06		0.234252	0.0332613	0.343535	0.0184662
SX-1	0.602767	1.06393e-05	1.52746	3.23845e-05	0.223183	1.64846e-06		0.207633		0.356235
NIST3134	0.60264	9.83024e-06	1.52691	3.1182e-05	0.223187	1.4126e-06
SX-1	0.602764	8.57682e-06	1.52744	2.91973e-05	0.223185	1.43436e-06		0.197828		0.332074
NIST3134	0.60265	1.00775e-05	1.52696	3.29168e-05	0.223172	1.57888e-06
SX-1	0.602787	8.10211e-06	1.52749	2.52686e-05	0.22317	1.19923e-06		0.213875		0.341161
NIST3134	0.602665	8.99449e-06	1.52698	3.23443e-05	0.223171	1.55815e-06		0.206445	0.0161785	0.343157	0.0244068
SX-1	0.602774	8.73977e-06	1.52749	2.91889e-05	0.223169	1.30957e-06		0.190062		0.329328
NIST3134	0.602653	9.71297e-06	1.527	3.04727e-05	0.223166	1.37945e-06
SX-1	0.602786	6.97973e-06	1.5275	3.07211e-05	0.223163	1.42626e-06		0.232063		0.337388
NIST3134	0.602639	9.213e-06	1.52697	2.63286e-05	0.223167	1.28268e-06
SX-1	0.602783	8.18684e-06	1.52747	2.98301e-05	0.223166	1.59087e-06		0.249625		0.356173
NIST3134	0.602625	9.98876e-06	1.52688	3.04724e-05	0.223171	1.30025e-06		0.223916	0.0612112	0.340963	0.0275496
SX-1	0.602774	9.88714e-06	1.52743	2.91077e-05	0.223173	1.42412e-06		0.250294		0.3562
NIST3134	0.602622	7.67051e-06	1.52689	2.38103e-05	0.223176	1.40499e-06
SX-1	0.602765	8.45209e-06	1.52745	3.26528e-05	0.223174	1.59975e-06		0.218939		0.345699
NIST3134	0.602645	9.33341e-06	1.52696	2.94082e-05	0.223171	1.338e-06
SX-1	0.602779	9.08747e-06	1.52744	3.33582e-05	0.223174	1.50586e-06		0.220576		0.301001
NIST3134	0.602648	8.92738e-06	1.527	2.73399e-05	0.223164	1.37338e-06		0.229936	0.0352987	0.3343	0.0586238
								0.222962	0.0330679	0.338654	0.0260217
NIST3134	0.602349	7.15064e-06	1.52565	2.18516e-05	0.222278	1.19881e-06
SX-2	0.602471	8.24867e-06	1.52607	2.69093e-05	0.222286	1.43723e-06		0.182022		0.259873
NIST3134	0.602374	5.71812e-06	1.5257	2.33073e-05	0.222281	1.41589e-06
SX-2	0.602484	6.20828e-06	1.52612	1.92185e-05	0.222284	1.0968e-06		0.188538		0.269498
NIST3134	0.602366	8.68801e-06	1.52573	2.48977e-05	0.222288	1.46327e-06
SX-2	0.60248	7.1903e-06	1.52609	2.24983e-05	0.22229	1.23324e-06		0.188509		0.248758
NIST3134	0.602368	9.26025e-06	1.52569	3.08454e-05	0.222289	1.61207e-06
SX-2	0.602489	7.04829e-06	1.52615	2.2588e-05	0.222292	1.45606e-06		0.192367		0.294513
NIST3134	0.602378	6.80984e-06	1.52572	2.21297e-05	0.22229	1.15197e-06
								0.187859	0.00858451	0.268161	0.0390107
NIST3134	0.602404	8.816e-06	1.52583	2.73672e-05	0.222325	1.31054e-06
SX-3	0.602636	7.4559e-06	1.52668	3.38321e-05	0.222323	1.77185e-06		0.384083		0.558322
NIST3134	0.602405	8.7823e-06	1.52583	2.45633e-05	0.222328	1.35104e-06
SX-3	0.602641	8.04258e-06	1.52671	2.76844e-05	0.222335	1.62425e-06		0.377434		0.563268
NIST3134	0.602423	6.39249e-06	1.52587	2.25971e-05	0.222329	1.32462e-06
SX-3	0.602633	8.15219e-06	1.52666	2.37116e-05	0.222335	1.40701e-06		0.349389		0.514603
NIST3134	0.602422	7.11189e-06	1.52588	2.12382e-05	0.222332	1.07445e-06
SX-3	0.602644	7.82984e-06	1.5267	2.84507e-05	0.222337	1.58373e-06		0.36797		0.532203
NIST3134	0.602424	7.32531e-06	1.5259	2.70533e-05	0.222329	1.25295e-06
								0.369719	0.0301594	0.542099	0.0456842
NIST3134	0.602427	6.97447e-06	1.52598	2.35276e-05	0.222468	1.30964e-06
GX-1	0.603237	7.4764e-06	1.52896	2.62509e-05	0.222468	1.44512e-06		1.34515		1.96267
NIST3134	0.602427	7.01192e-06	1.52595	2.26971e-05	0.222464	1.34697e-06
GX-1	0.603226	7.15078e-06	1.52897	2.35783e-05	0.222429	1.13772e-06		1.30881		1.95492
NIST3134	0.602447	8.83455e-06	1.52601	2.51723e-05	0.222444	1.40722e-06
GX-1	0.603243	6.91647e-06	1.52902	2.38885e-05	0.222446	1.64794e-06		1.30703		1.94995
NIST3134	0.602465	6.66069e-06	1.52607	2.24073e-05	0.222445	1.45181e-06
GX-1	0.603246	7.67688e-06	1.52901	2.59675e-05	0.222429	1.55575e-06		1.31107		1.93996
NIST3134	0.602447	6.78021e-06	1.52602	2.69155e-05	0.22245	1.35227e-06
								1.31801	0.0363335	1.95187	0.0190223
LA-MC-ICP-MS results
SampleName	97Mo/95Mo	StdErr	98Mo/95Mo	StdErr		δ97Mo	δ97MoNIST SRM 3134	2SD	δ98Mo	δ98MoNIST SRM 3134	2SD
Mo-H8	0.623974	8.05804e-06	1.60821	1.98495e-05
GD-1	0.623632	8.33874e-06	1.607	1.70367e-05		-0.533935	-0.0639352		-0.740303	-0.0403034
Mo-H8	0.623957	9.58133e-06	1.60818	1.86261e-05
GD-1	0.623633	7.01588e-06	1.60697	1.89195e-05		-0.516773	-0.0467726		-0.748745	-0.0487446
Mo-H8	0.623953	9.23916e-06	1.60817	1.75254e-05
GD-1	0.6236	7.60459e-06	1.60683	2.09062e-05		-0.56727	-0.0972698		-0.838191	-0.138191
Mo-H8	0.623955	8.45271e-06	1.60818	1.92141e-05
GD-1	0.623621	8.03058e-06	1.60698	1.88933e-05		-0.533373	-0.0633727		-0.748006	-0.0480057
Mo-H8	0.623953	9.66575e-06	1.60819	1.89046e-05
GD-1	0.62367	6.87178e-06	1.60711	1.86299e-05		-0.459484	0.0105161		-0.663416	0.0365841
Mo-H8	0.62396	7.53939e-06	1.60815	1.73138e-05
GD-1	0.623669	8.23032e-06	1.60709	1.81772e-05		-0.463311	0.00668858		-0.672436	0.0275636
Mo-H8	0.623956	8.30148e-06	1.60818	1.73412e-05
GD-1	0.623665	7.63243e-06	1.60709	1.82134e-05		-0.46634	0.00365969		-0.67625	0.0237501
Mo-H8	0.623955	7.77326e-06	1.60818	2.04427e-05
GD-1	0.623679	8.16143e-06	1.60714	2.16682e-05		-0.439764	0.0302359		-0.642299	0.0577009
Mo-H8	0.623951	8.81163e-06	1.60817	1.89694e-05
GD-1	0.623678	7.35288e-06	1.60713	1.88626e-05		-0.476145	-0.00614482		-0.681762	0.0182377
Mo-H8	0.623999	6.66477e-06	1.60829	1.73826e-05
GD-1	0.623649	7.361e-06	1.60701	1.96828e-05		-0.554367	-0.0843672		-0.800255	-0.100255
Mo-H8	0.623991	9.0179e-06	1.6083	1.89012e-05
GD-1	0.623665	7.76806e-06	1.60712	1.74847e-05		-0.513989	-0.0439889		-0.717605	-0.0176052
Mo-H8	0.623981	1.04331e-05	1.60825	1.85724e-05
GD-1	0.623685	7.73027e-06	1.60718	1.5704e-05		-0.470455	-0.00045524		-0.650423	0.0495772
Mo-H8	0.623977	9.33922e-06	1.60821	1.6708e-05
GD-1	0.623666	8.02856e-06	1.60709	1.90101e-05		-0.503804	-0.0338039		-0.713277	-0.0132771
Mo-H8	0.623983	8.67148e-06	1.60827	1.76753e-05
GD-1	0.623672	8.13527e-06	1.60708	1.78122e-05		-0.497103	-0.0271034		-0.737931	-0.0379311
Mo-H8	0.623981	9.492e-06	1.60827	1.7876e-05
GD-1	0.623684	8.65931e-06	1.60714	1.98007e-05		-0.486882	-0.0168824		-0.707939	-0.00793866
Mo-H8	0.623995	7.17639e-06	1.60828	1.96812e-05
GD-1	0.623646	8.71219e-06	1.607	1.78938e-05		-0.560059	-0.0900591		-0.796932	-0.0969317
Mo-H8	0.623996	8.6392e-06	1.60829	1.6702e-05
GD-1	0.623641	7.09845e-06	1.60698	1.68123e-05		-0.539146	-0.0691465		-0.780604	-0.0806042
Mo-H8	0.62396	8.9827e-06	1.60819	1.83729e-05
GD-1	0.623674	7.42454e-06	1.60709	1.68117e-05		-0.489823	-0.0198234		-0.718719	-0.018719
Mo-H8	0.624	7.6141e-06	1.60831	1.8068e-05
GD-1	0.623648	7.23927e-06	1.60702	1.45689e-05		-0.572603	-0.102603		-0.824887	-0.124887
Mo-H8	0.62401	9.65293e-06	1.60838	1.87608e-05
GD-1	0.623638	8.76119e-06	1.60697	1.61842e-05		-0.582714	-0.112714		-0.856855	-0.156855
Mo-H8	0.623992	8.88348e-06	1.60833	1.66423e-05
GD-1	0.623637	7.78517e-06	1.60696	1.48734e-05		-0.572796	-0.102796		-0.835944	-0.135944
Mo-H8	0.623997	8.13424e-06	1.60829	1.71552e-05
GD-1	0.623662	8.4508e-06	1.60702	1.51662e-05		-0.531277	-0.0612772		-0.800926	-0.100926
Mo-H8	0.623991	9.96837e-06	1.60832	1.7268e-05
GD-1	0.623666	8.48634e-06	1.60705	1.83628e-05		-0.523765	-0.0537652		-0.79192	-0.0919203
Mo-H8	0.623995	7.86462e-06	1.60834	1.70751e-05
GD-1	0.623652	8.19822e-06	1.60698	1.96325e-05		-0.546854	-0.0768543		-0.84055	-0.14055
Mo-H8	0.623991	7.98695e-06	1.60832	1.75063e-05
GD-1	0.623678	7.63372e-06	1.60712	1.86029e-05		-0.49797	-0.0279702		-0.72975	-0.0297496
Mo-H8	0.623986	8.40335e-06	1.60827	1.94737e-05
Mo-H8	0.625355	7.63112e-06	1.61369	1.54524e-05
GD-1	0.625009	7.5067e-06	1.61232	2.0432e-05		-0.562488	-0.0924885		-0.869674	-0.169674
Mo-H8	0.625366	7.67703e-06	1.61376	1.75534e-05
GD-1	0.625026	8.68462e-06	1.61239	2.09508e-05		-0.544336	-0.0743364		-0.832292	-0.132292
Mo-H8	0.625368	6.85364e-06	1.6137	1.55174e-05
GD-1	0.625063	8.29454e-06	1.61257	1.82423e-05		-0.510187	-0.0401865		-0.749876	-0.049876
Mo-H8	0.625395	8.31923e-06	1.61386	1.6096e-05
GD-1	0.62502	7.89971e-06	1.61243	1.64584e-05		-0.582712	-0.112712		-0.849632	-0.149632
Mo-H8	0.625373	7.05922e-06	1.61373	1.89516e-05
GD-1	0.625063	8.3807e-06	1.61253	2.00232e-05		-0.473778	-0.00377801		-0.737295	-0.0372947
Mo-H8	0.625345	7.58956e-06	1.61372	2.18523e-05
GD-1	0.62503	8.1424e-06	1.61249	1.96506e-05		-0.538534	-0.0685342		-0.791203	-0.0912029
Mo-H8	0.625389	7.95657e-06	1.61381	1.9138e-05
GD-1	0.625015	8.46691e-06	1.61242	2.50891e-05		-0.587267	-0.117267		-0.831738	-0.131738
Mo-H8	0.625376	8.04965e-06	1.61371	1.96784e-05
GD-1	0.625033	7.90571e-06	1.6124	1.91158e-05		-0.523308	-0.0533082		-0.795346	-0.095346
Mo-H8	0.625345	6.48503e-06	1.61367	1.49596e-05
GD-1	0.624967	8.56732e-06	1.61225	2.43807e-05		-0.616366	-0.146366		-0.878565	-0.178565
Mo-H8	0.62536	7.36959e-06	1.61367	1.35755e-05
GD-1	0.625031	9.83511e-06	1.61246	2.15354e-05		-0.504134	-0.0341342		-0.744547	-0.0445475
Mo-H8	0.625333	8.96316e-06	1.61366	2.08166e-05
GD-1	0.625033	9.21483e-06	1.61248	2.07789e-05		-0.488754	-0.0187537		-0.737439	-0.0374391
Mo-H8	0.625343	7.74186e-06	1.61367	1.45406e-05
GD-1	0.625014	7.86043e-06	1.61242	2.28658e-05		-0.551733	-0.0817333		-0.80039	-0.10039
Mo-H8	0.625375	7.10771e-06	1.61375	1.55907e-05
GD-1	0.625021	6.77842e-06	1.61245	1.72057e-05		-0.561793	-0.0917934		-0.804453	-0.104453
Mo-H8	0.62537	5.98729e-06	1.61374	1.58538e-05
GD-1	0.625006	7.34054e-06	1.61234	1.8208e-05		-0.592921	-0.122921		-0.880282	-0.180282
Mo-H8	0.625384	7.19262e-06	1.61379	1.56833e-05
							-0.0566235	0.0860378		-0.0697091	0.132582
Mo-H8	0.623918	7.7283e-06	1.60803	1.85803e-05
GD-2	0.623546	7.52838e-06	1.60656	1.61667e-05		-0.602245	-0.132245		-0.915203	-0.215203
Mo-H8	0.623926	8.66331e-06	1.60803	1.77868e-05
GD-2	0.623536	8.55999e-06	1.60658	1.85103e-05		-0.630926	-0.160926		-0.912401	-0.212401
Mo-H8	0.623934	7.73788e-06	1.60806	1.7127e-05
GD-2	0.623554	7.44337e-06	1.60664	1.78184e-05		-0.623058	-0.153058		-0.898566	-0.198566
Mo-H8	0.623951	7.31143e-06	1.6081	1.61515e-05
GD-2	0.623516	9.16543e-06	1.60652	2.02992e-05		-0.666423	-0.196423		-0.960913	-0.260913
Mo-H8	0.623912	8.08716e-06	1.60802	1.76054e-05
GD-2	0.623537	7.40023e-06	1.60659	2.0046e-05		-0.622674	-0.152674		-0.921362	-0.221362
Mo-H8	0.623938	8.30165e-06	1.60811	1.94544e-05
GD-2	0.623539	7.57657e-06	1.60659	1.72717e-05		-0.618971	-0.148971		-0.928545	-0.228545
Mo-H8	0.623912	8.11366e-06	1.60805	2.09352e-05
GD-2	0.623561	8.47285e-06	1.60671	1.86334e-05		-0.563796	-0.093796		-0.826902	-0.126902
Mo-H8	0.623913	8.97783e-06	1.60802	1.84937e-05
GD-2	0.623578	8.79244e-06	1.60668	1.70596e-05		-0.541175	-0.0711754		-0.835845	-0.135845
Mo-H8	0.623919	8.69423e-06	1.60803	1.93524e-05
GD-2	0.623573	8.04386e-06	1.60672	1.82284e-05		-0.582402	-0.112402		-0.830448	-0.130448
Mo-H8	0.623953	8.13756e-06	1.60808	1.84084e-05
GD-2	0.623579	1.00709e-05	1.60672	2.18518e-05		-0.587745	-0.117745		-0.848019	-0.148019
Mo-H8	0.623938	8.60203e-06	1.60809	1.7946e-05
GD-2	0.623591	7.77457e-06	1.60674	1.79932e-05		-0.552536	-0.082536		-0.833066	-0.133066
Mo-H8	0.623934	8.89227e-06	1.60806	1.54665e-05
GD-2	0.623562	8.09843e-06	1.60671	1.5876e-05		-0.586984	-0.116984		-0.82716	-0.12716
Mo-H8	0.623923	8.13131e-06	1.60802	1.75712e-05
GD-2	0.623546	8.84794e-06	1.60663	1.96321e-05		-0.608341	-0.138341		-0.898519	-0.198519
Mo-H8	0.623928	8.38576e-06	1.60813	2.11021e-05
GD-2	0.62352	8.39155e-06	1.6065	1.98225e-05		-0.665842	-0.195842		-1.01566	-0.315658
Mo-H8	0.623943	8.14059e-06	1.60815	1.84694e-05
GD-2	0.62355	8.83163e-06	1.6066	1.77231e-05		-0.617395	-0.147395		-0.939612	-0.239612
Mo-H8	0.623928	8.88854e-06	1.60808	2.02443e-05
GD-2	0.623507	7.6467e-06	1.60645	1.84781e-05		-0.682293	-0.212293		-1.02034	-0.320339
Mo-H8	0.623939	1.01296e-05	1.6081	1.82237e-05
GD-2	0.623517	8.57604e-06	1.60647	1.50974e-05		-0.660005	-0.190005		-1.00084	-0.30084
Mo-H8	0.623918	9.95267e-06	1.60807	1.94175e-05
GD-2	0.62355	8.71025e-06	1.60662	1.85679e-05		-0.622282	-0.152282		-0.926023	-0.226023
Mo-H8	0.623958	9.54053e-06	1.60814	2.10402e-05
GD-2	0.623548	1.06064e-05	1.60659	2.30104e-05		-0.645096	-0.175096		-0.955619	-0.255619
Mo-H8	0.623943	7.98197e-06	1.6081	1.8537e-05
GD-2	0.623519	9.58529e-06	1.60644	2.16743e-05		-0.687778	-0.217778		-1.0536	-0.353595
Mo-H8	0.623953	9.00648e-06	1.60816	1.73079e-05
GD-2	0.623518	9.04579e-06	1.60651	1.91136e-05		-0.681236	-0.211236		-0.993499	-0.293499
Mo-H8	0.623933	8.38815e-06	1.60806	1.93621e-05
GD-2	0.623533	6.74175e-06	1.60653	1.62808e-05		-0.642452	-0.172452		-0.973256	-0.273256
Mo-H8	0.623934	1.00809e-05	1.60813	2.37656e-05
GD-2	0.623549	7.98546e-06	1.60658	1.65729e-05		-0.628432	-0.158432		-0.965877	-0.265877
Mo-H8	0.623949	9.01257e-06	1.60813	1.9286e-05
GD-2	0.623542	7.3587e-06	1.60658	2.1159e-05		-0.651803	-0.181803		-0.966228	-0.266228
Mo-H8	0.623949	8.74164e-06	1.60813	2.04485e-05
GD-2	0.623555	7.27681e-06	1.60664	1.87359e-05		-0.616414	-0.146414		-0.91173	-0.21173
Mo-H8	0.62393	9.72839e-06	1.60808	1.96487e-05
							-0.153532	0.0796517		-0.226369	0.1321
Mo-H8	0.623925	8.41286e-06	1.60802	2.09398e-05
YN-1	0.623802	9.11239e-06	1.60757	2.02246e-05		-0.173735	0.296265		-0.258128	0.441872
Mo-H8	0.623896	9.2331e-06	1.60795	2.07086e-05
YN-1	0.623762	8.83555e-06	1.60745	1.98658e-05		-0.207075	0.262925		-0.303724	0.396276
Mo-H8	0.623885	8.88086e-06	1.60792	2.13446e-05
YN-1	0.623796	7.60942e-06	1.60755	2.01316e-05		-0.126512	0.343488		-0.202532	0.497468
Mo-H8	0.623865	9.36864e-06	1.60783	2.16175e-05
YN-1	0.623775	9.07019e-06	1.60753	2.17973e-05		-0.149105	0.320895		-0.195788	0.504212
Mo-H8	0.623872	8.97531e-06	1.60786	1.87663e-05
YN-1	0.623772	1.04576e-05	1.60748	2.19691e-05		-0.1609	0.3091		-0.237919	0.462081
Mo-H8	0.623872	9.06853e-06	1.60786	2.00917e-05
YN-1	0.623765	7.62913e-06	1.6075	1.56184e-05		-0.173587	0.296413		-0.226862	0.473138
Mo-H8	0.623875	9.67243e-06	1.60786	2.0418e-05
YN-1	0.623743	9.2334e-06	1.60737	1.97613e-05		-0.205817	0.264183		-0.303648	0.396352
Mo-H8	0.623868	8.7638e-06	1.60785	2.15758e-05
YN-1	0.623755	7.74409e-06	1.60742	1.41422e-05		-0.168881	0.301119		-0.243046	0.456954
Mo-H8	0.623854	8.46939e-06	1.60777	1.99535e-05
YN-1	0.623776	9.01573e-06	1.6075	1.82068e-05		-0.143645	0.326355		-0.198795	0.501205
Mo-H8	0.623879	8.81778e-06	1.60786	1.94054e-05
YN-1	0.623744	7.25268e-06	1.60739	2.01292e-05		-0.212045	0.257955		-0.286803	0.413197
Mo-H8	0.623874	9.23465e-06	1.60784	2.51404e-05
YN-1	0.623764	8.89471e-06	1.60744	1.78828e-05		-0.177719	0.292281		-0.24938	0.45062
Mo-H8	0.623875	9.30696e-06	1.60785	2.59661e-05
YN-1	0.62379	9.06491e-06	1.60757	2.03233e-05		-0.141059	0.328941		-0.204148	0.495852
Mo-H8	0.623882	9.13504e-06	1.60795	1.9127e-05
YN-1	0.623786	9.55688e-06	1.60754	2.08335e-05		-0.16354	0.30646		-0.261713	0.438287
Mo-H8	0.623895	8.95443e-06	1.60798	2.081e-05
Mo-H8	0.625302	7.58432e-06	1.61346	1.52644e-05
YN-1	0.625142	8.26871e-06	1.61285	1.81773e-05		-0.270206	0.199794		-0.418046	0.281954
Mo-H8	0.625319	8.11261e-06	1.61358	2.1555e-05
YN-1	0.625194	1.16861e-05	1.61312	2.48104e-05		-0.192362	0.277638		-0.264097	0.435903
Mo-H8	0.62531	6.69632e-06	1.61352	1.26103e-05
YN-1	0.625144	9.38462e-06	1.61283	2.65531e-05		-0.255012	0.214988		-0.416995	0.283005
Mo-H8	0.625298	6.51778e-06	1.6135	1.68342e-05
YN-1	0.625127	8.87242e-06	1.61285	2.37732e-05		-0.294069	0.175931		-0.413418	0.286582
Mo-H8	0.625323	7.2985e-06	1.61354	1.91096e-05
YN-1	0.625124	8.76328e-06	1.61279	2.51758e-05		-0.324231	0.145769		-0.472919	0.227081
Mo-H8	0.62533	7.22484e-06	1.61357	1.6254e-05
YN-1	0.625125	7.75893e-06	1.61289	2.04414e-05		-0.313774	0.156226		-0.405725	0.294275
Mo-H8	0.625312	6.88157e-06	1.61352	1.80258e-05
YN-1	0.625134	1.00003e-05	1.61292	2.48154e-05		-0.29898	0.17102		-0.396422	0.303578
Mo-H8	0.62533	7.48486e-06	1.6136	1.59448e-05
YN-1	0.625193	1.09791e-05	1.61311	3.24576e-05		-0.237319	0.232681		-0.320564	0.379436
Mo-H8	0.625353	7.61788e-06	1.61366	1.7346e-05
YN-1	0.625189	9.07713e-06	1.61305	2.18922e-05		-0.241009	0.228991		-0.377867	0.322133
Mo-H8	0.625327	7.0471e-06	1.61365	1.83038e-05
YN-1	0.62516	8.69103e-06	1.61296	1.99555e-05		-0.284095	0.185905		-0.441279	0.258721
Mo-H8	0.625348	7.16723e-06	1.61369	2.02616e-05
YN-1	0.625178	7.8134e-06	1.61303	2.03099e-05		-0.293033	0.176967		-0.415942	0.284058
Mo-H8	0.625374	8.12783e-06	1.61372	1.75491e-05
YN-1	0.625164	8.94683e-06	1.61303	2.31833e-05		-0.310319	0.159681		-0.384296	0.315704
Mo-H8	0.625343	9.80551e-06	1.61359	2.13555e-05
YN-1	0.625197	8.44763e-06	1.61308	2.35824e-05		-0.216727	0.253273		-0.320684	0.379316
Mo-H8	0.625323	7.96215e-06	1.6136	1.8837e-05
YN-1	0.625147	6.74532e-06	1.6129	1.76373e-05		-0.275527	0.194473		-0.428684	0.271316
Mo-H8	0.625316	8.3391e-06	1.61358	1.70988e-05
YN-1	0.625197	7.86399e-06	1.61314	2.41703e-05		-0.191677	0.278323		-0.262284	0.437716
Mo-H8	0.625317	7.03703e-06	1.61356	1.62977e-05
YN-1	0.625188	7.89273e-06	1.6131	2.21463e-05		-0.199327	0.270673		-0.280475	0.419525
Mo-H8	0.625308	6.50301e-06	1.61354	1.83788e-05
YN-1	0.625218	7.78408e-06	1.61317	2.06789e-05		-0.144559	0.325441		-0.226496	0.473504
Mo-H8	0.625309	6.8133e-06	1.61353	1.57436e-05
YN-1	0.625181	7.85853e-06	1.61298	1.59663e-05		-0.216396	0.253604		-0.354841	0.345159
Mo-H8	0.625323	7.81509e-06	1.61357	1.69511e-05
YN-1	0.625165	8.24614e-06	1.61295	2.23142e-05		-0.239229	0.230771		-0.365771	0.334229
Mo-H8	0.625306	8.15446e-06	1.6135	1.71169e-05
Mo-H8	0.624229	1.03565e-05	1.6095	2.22385e-05
YN-1	0.624086	8.69996e-06	1.60885	2.50484e-05		-0.211045	0.258955		-0.346341	0.353659
Mo-H8	0.624206	1.00463e-05	1.60932	2.36561e-05
YN-1	0.624071	8.3856e-06	1.60879	2.54684e-05		-0.200335	0.269665		-0.310492	0.389508
Mo-H8	0.624186	1.051e-05	1.60927	2.51696e-05
YN-1	0.624117	1.06766e-05	1.60899	2.66205e-05		-0.130891	0.339109		-0.201395	0.498605
Mo-H8	0.624212	1.11016e-05	1.60935	3.01223e-05
YN-1	0.624057	7.75534e-06	1.60877	2.0531e-05		-0.221684	0.248316		-0.339921	0.360079
Mo-H8	0.62418	9.05804e-06	1.60928	2.07711e-05
YN-1	0.624108	8.53193e-06	1.60887	2.11036e-05		-0.136134	0.333866		-0.243962	0.456038
Mo-H8	0.624207	9.73903e-06	1.60925	2.20242e-05
YN-1	0.62409	8.70836e-06	1.60889	2.09011e-05		-0.17613	0.29387		-0.230411	0.469589
Mo-H8	0.624192	8.83745e-06	1.60926	2.45067e-05
YN-1	0.6241	9.04371e-06	1.60889	2.10116e-05		-0.150567	0.319433		-0.242258	0.457742
Mo-H8	0.624196	1.09883e-05	1.6093	2.18357e-05
YN-1	0.624074	1.06651e-05	1.60882	2.49505e-05		-0.191572	0.278428		-0.296451	0.403549
Mo-H8	0.624191	9.73808e-06	1.60929	2.3489e-05
YN-1	0.62409	9.02319e-06	1.60894	2.23022e-05		-0.169631	0.300369		-0.221572	0.478428
Mo-H8	0.624201	9.32813e-06	1.60931	2.47556e-05
YN-1	0.624113	1.00961e-05	1.60892	2.53947e-05		-0.135191	0.334809		-0.230433	0.469567
Mo-H8	0.624195	8.64047e-06	1.60927	2.26204e-05
YN-1	0.624064	8.11433e-06	1.60874	1.77711e-05		-0.217881	0.252119		-0.332428	0.367572
Mo-H8	0.624205	1.00795e-05	1.60927	2.30819e-05
YN-1	0.624089	8.68166e-06	1.60884	2.17723e-05		-0.190184	0.279816		-0.266148	0.433852
Mo-H8	0.62421	9.37022e-06	1.60926	2.17984e-05
YN-1	0.624067	9.16523e-06	1.60877	1.9874e-05		-0.209876	0.260124		-0.310751	0.389249
Mo-H8	0.624187	8.49946e-06	1.60927	1.83739e-05
YN-1	0.624094	9.25401e-06	1.60889	2.18933e-05		-0.197469	0.272531		-0.308932	0.391068
Mo-H8	0.624248	1.16939e-05	1.60949	2.353e-05
YN-1	0.624064	9.18687e-06	1.60877	2.0864e-05		-0.263528	0.206472		-0.403197	0.296803
Mo-H8	0.624209	8.91895e-06	1.60934	2.191e-05
YN-1	0.624074	8.40827e-06	1.6088	1.97833e-05		-0.209175	0.260825		-0.333607	0.366393
Mo-H8	0.624199	8.86212e-06	1.60934	2.22443e-05
YN-1	0.624116	9.42126e-06	1.60894	2.06222e-05		-0.174826	0.295174		-0.276162	0.423838
Mo-H8	0.624251	9.55069e-06	1.60942	2.18518e-05
							0.26209	0.106999		0.393189	0.152002
Mo-H8	0.623915	8.68157e-06	1.60804	1.9041e-05
YN-2	0.623487	1.16159e-05	1.60635	2.79244e-05		-0.700961	-0.230961		-1.06626	-0.366261
Mo-H8	0.623934	8.84776e-06	1.60808	1.76022e-05
YN-2	0.623517	1.26526e-05	1.6065	2.63509e-05		-0.656908	-0.186908		-0.97647	-0.27647
Mo-H8	0.623921	8.39838e-06	1.60806	1.62119e-05
YN-2	0.623484	1.20825e-05	1.60643	2.54524e-05		-0.749131	-0.279131		-1.06488	-0.364876
Mo-H8	0.623982	9.99507e-06	1.60823	2.78354e-05
YN-2	0.623543	9.94187e-06	1.60666	2.03478e-05		-0.68679	-0.21679		-0.962154	-0.262154
Mo-H8	0.623961	8.95406e-06	1.60817	2.55039e-05
YN-2	0.623562	1.06331e-05	1.60664	2.1803e-05		-0.603309	-0.133309		-0.90127	-0.20127
Mo-H8	0.623916	8.47863e-06	1.60801	1.41694e-05
YN-2	0.623475	1.1316e-05	1.60631	2.31109e-05		-0.71935	-0.24935		-1.06704	-0.367039
Mo-H8	0.623932	9.27459e-06	1.60804	1.91213e-05
YN-2	0.623554	7.77886e-06	1.60654	1.76225e-05		-0.600889	-0.130889		-0.933961	-0.233961
Mo-H8	0.623926	8.89475e-06	1.60804	2.01618e-05
YN-2	0.623542	8.82366e-06	1.60659	1.81949e-05		-0.624028	-0.154028		-0.898751	-0.198751
Mo-H8	0.623936	8.67678e-06	1.60803	1.8129e-05
YN-2	0.623543	8.77513e-06	1.60655	2.00622e-05		-0.625461	-0.155461		-0.931865	-0.231865
Mo-H8	0.62393	9.33725e-06	1.60806	1.78685e-05
YN-2	0.623518	1.13197e-05	1.60648	2.1324e-05		-0.643593	-0.173593		-0.974646	-0.274646
Mo-H8	0.623909	8.23861e-06	1.60803	1.682e-05
YN-2	0.623532	1.04827e-05	1.60659	2.13208e-05		-0.609518	-0.139518		-0.891602	-0.191602
Mo-H8	0.623916	9.04411e-06	1.60802	1.93114e-05
YN-2	0.623501	9.70289e-06	1.60638	1.65658e-05		-0.67135	-0.20135		-0.99991	-0.29991
Mo-H8	0.623924	7.63915e-06	1.60796	1.75027e-05
YN-2	0.623528	9.03654e-06	1.60655	2.19488e-05		-0.622941	-0.152941		-0.901214	-0.201214
Mo-H8	0.62391	9.10551e-06	1.60804	1.77298e-05
YN-2	0.623487	8.46948e-06	1.60645	1.9808e-05		-0.697092	-0.227092		-0.992769	-0.292769
Mo-H8	0.623934	8.82165e-06	1.60806	2.03155e-05
YN-2	0.623499	8.58572e-06	1.60642	2.14574e-05		-0.682794	-0.212794		-1.01001	-0.310009
Mo-H8	0.623916	7.96813e-06	1.60803	1.76498e-05
YN-2	0.623507	8.99448e-06	1.60646	2.09228e-05		-0.674331	-0.204331		-0.99146	-0.29146
Mo-H8	0.62394	1.01627e-05	1.60807	1.78891e-05
YN-2	0.623493	8.38787e-06	1.60644	1.99774e-05		-0.726782	-0.256782		-1.02316	-0.323162
Mo-H8	0.623954	9.47206e-06	1.60811	1.90661e-05
YN-2	0.623494	8.76245e-06	1.60645	1.85807e-05		-0.703594	-0.233594		-1.0015	-0.301503
Mo-H8	0.623912	8.57895e-06	1.60802	1.71486e-05
YN-2	0.623489	7.01795e-06	1.60643	1.92915e-05		-0.681816	-0.211816		-0.984441	-0.284441
Mo-H8	0.623917	9.06194e-06	1.608	1.68506e-05
							-0.197402	0.0885472		-0.277545	0.113196
Mo-H8	0.623853	8.67965e-06	1.60771	1.93105e-05
YN-3	0.623586	8.9701e-06	1.60674	2.01801e-05		-0.472932	-0.00293152		-0.674626	0.025374
Mo-H8	0.62391	9.79013e-06	1.60795	2.38397e-05
YN-3	0.623596	8.44822e-06	1.60681	2.12339e-05		-0.452507	0.0174934		-0.647103	0.0528974
Mo-H8	0.623846	9.63094e-06	1.60775	1.80437e-05
YN-3	0.62358	1.0271e-05	1.60673	2.35608e-05		-0.427016	0.0429839		-0.619585	0.0804151
Mo-H8	0.623847	8.59218e-06	1.6077	1.88943e-05
YN-3	0.623608	8.93441e-06	1.60687	1.82751e-05		-0.370272	0.0997279		-0.524141	0.175859
Mo-H8	0.623831	8.93603e-06	1.60774	2.18723e-05
YN-3	0.623593	9.62592e-06	1.60678	2.13743e-05		-0.379711	0.0902893		-0.578725	0.121275
Mo-H8	0.623828	9.37977e-06	1.60768	2.14758e-05
YN-3	0.623568	1.04472e-05	1.60672	2.18014e-05		-0.425828	0.0441724		-0.608023	0.0919767
Mo-H8	0.62384	8.98055e-06	1.60772	1.87245e-05
YN-3	0.623553	8.77339e-06	1.60657	2.11593e-05		-0.443517	0.0264827		-0.695277	0.00472295
Mo-H8	0.62382	9.85097e-06	1.60764	2.25604e-05
YN-3	0.623603	9.54212e-06	1.60682	2.0644e-05		-0.365936	0.104064		-0.527206	0.172794
Mo-H8	0.623842	8.64937e-06	1.6077	1.77277e-05
YN-3	0.623579	8.84088e-06	1.60667	2.24586e-05		-0.42456	0.0454396		-0.649789	0.0502107
Mo-H8	0.623844	7.85202e-06	1.60773	1.80039e-05
YN-3	0.623582	8.60975e-06	1.60674	1.78877e-05		-0.410752	0.0592478		-0.604669	0.0953314
Mo-H8	0.623832	8.4357e-06	1.60769	1.76209e-05
YN-3	0.623628	9.62113e-06	1.6069	2.04266e-05		-0.329566	0.140434		-0.503441	0.196559
Mo-H8	0.623835	9.49296e-06	1.60773	2.35535e-05
YN-3	0.623613	1.06411e-05	1.60687	2.34072e-05		-0.360093	0.109907		-0.502859	0.197141
Mo-H8	0.623839	8.91553e-06	1.60762	1.92256e-05
YN-3	0.623609	9.38901e-06	1.60683	2.09841e-05		-0.354216	0.115784		-0.498357	0.201643
Mo-H8	0.62382	9.0741e-06	1.60764	2.05332e-05
YN-3	0.623604	9.32996e-06	1.60679	1.89588e-05		-0.340527	0.129473		-0.530583	0.169417
Mo-H8	0.623813	8.88178e-06	1.60764	1.94054e-05
YN-3	0.623593	8.20342e-06	1.60674	1.9504e-05		-0.35606	0.11394		-0.548911	0.151089
Mo-H8	0.623818	9.48479e-06	1.60761	1.78758e-05
YN-3	0.623622	8.65498e-06	1.60683	2.19541e-05		-0.315912	0.154088		-0.487449	0.212551
Mo-H8	0.623821	8.80178e-06	1.60762	1.92448e-05
YN-3	0.623633	9.64707e-06	1.60684	2.50661e-05		-0.312651	0.157349		-0.503141	0.196859
Mo-H8	0.623835	9.77085e-06	1.60766	1.77608e-05
YN-3	0.623624	9.85702e-06	1.60682	2.25459e-05		-0.340744	0.129256		-0.522659	0.177341
Mo-H8	0.623837	8.84514e-06	1.60766	1.84314e-05
YN-3	0.623548	8.48599e-06	1.60665	2.03439e-05		-0.463651	0.00634892		-0.624858	0.0751423
Mo-H8	0.623837	8.42265e-06	1.60765	1.83005e-05
YN-3	0.623558	9.41133e-06	1.60665	1.92704e-05		-0.422702	0.0472985		-0.615199	0.0848008
Mo-H8	0.623807	1.02364e-05	1.60762	2.01674e-05
YN-3	0.623565	9.57962e-06	1.60667	2.32465e-05		-0.395171	0.0748292		-0.589892	0.110108
Mo-H8	0.623817	7.80901e-06	1.60761	1.99064e-05
YN-3	0.623532	9.36157e-06	1.60653	1.61049e-05		-0.466782	0.003218		-0.660537	0.0394635
Mo-H8	0.62383	8.76382e-06	1.60758	1.88878e-05
YN-3	0.623546	8.46222e-06	1.60658	1.93976e-05		-0.43997	0.0300296		-0.629072	0.0709282
Mo-H8	0.62381	8.60938e-06	1.60761	1.6879e-05
YN-3	0.623569	1.08056e-05	1.60667	2.66859e-05		-0.377048	0.0929523		-0.585736	0.114264
Mo-H8	0.623799	9.97819e-06	1.60761	1.7204e-05
YN-3	0.623552	9.52343e-06	1.60663	2.05106e-05		-0.419545	0.0504551		-0.612093	0.0879067
Mo-H8	0.623828	8.39604e-06	1.60761	1.92625e-05
YN-3	0.623557	9.14662e-06	1.60666	2.00666e-05		-0.418248	0.0517518		-0.583909	0.116091
Mo-H8	0.623809	9.15364e-06	1.60758	1.98013e-05
YN-3	0.623567	8.14417e-06	1.60669	1.94204e-05		-0.385203	0.0847973		-0.547784	0.152216
Mo-H8	0.623806	1.02443e-05	1.60756	1.89755e-05
YN-3	0.623568	7.88521e-06	1.60665	2.22979e-05		-0.381049	0.0889509		-0.575087	0.124913
Mo-H8	0.623805	8.64913e-06	1.60759	2.29913e-05
YN-3	0.623615	9.80638e-06	1.60686	2.22578e-05		-0.304073	0.165927		-0.468491	0.231509
Mo-H8	0.623803	9.13354e-06	1.60763	1.94888e-05
YN-3	0.623587	9.20508e-06	1.60679	1.98105e-05		-0.349183	0.120817		-0.519449	0.180551
Mo-H8	0.623806	8.79421e-06	1.60761	1.92587e-05
YN-3	0.623543	9.62788e-06	1.60659	2.53934e-05		-0.423673	0.046327		-0.637907	0.0620934
Mo-H8	0.623808	9.71339e-06	1.60762	1.98822e-05
YN-3	0.623519	8.36253e-06	1.60658	2.16364e-05		-0.468082	0.00191824		-0.64167	0.0583298
Mo-H8	0.623815	8.85169e-06	1.6076	1.63596e-05
							0.0763381	0.0983951		0.121305	0.123246
Mo-H8	0.623932	8.54196e-06	1.60806	1.76213e-05
SX-1	0.62373	8.18524e-06	1.60734	1.72364e-05		-0.29706	0.17294		-0.41202	0.28798
Mo-H8	0.6239	8.92614e-06	1.60794	1.72627e-05
SX-1	0.623716	8.82965e-06	1.60727	1.94503e-05		-0.279816	0.190184		-0.402185	0.297815
Mo-H8	0.623882	8.4035e-06	1.60789	1.91122e-05
SX-1	0.6237	9.15602e-06	1.60724	1.88298e-05		-0.288778	0.181222		-0.401301	0.298699
Mo-H8	0.623879	7.85524e-06	1.60789	1.77272e-05
SX-1	0.62369	7.41899e-06	1.60717	1.57497e-05		-0.302287	0.167713		-0.443359	0.256641
Mo-H8	0.623878	7.74484e-06	1.60787	1.67165e-05
SX-1	0.62378	7.7502e-06	1.60749	1.81222e-05		-0.170447	0.299553		-0.250077	0.449923
Mo-H8	0.623894	7.50435e-06	1.6079	2.0565e-05
SX-1	0.623766	8.18362e-06	1.60743	1.6642e-05		-0.201981	0.268019		-0.30355	0.39645
Mo-H8	0.62389	8.18819e-06	1.60794	1.92575e-05
SX-1	0.623769	8.6766e-06	1.60746	2.48704e-05		-0.187292	0.282708		-0.267574	0.432426
Mo-H8	0.623882	9.11916e-06	1.60785	2.04804e-05
SX-1	0.623754	8.89174e-06	1.60744	1.6015e-05		-0.19692	0.27308		-0.25378	0.44622
Mo-H8	0.623872	7.52639e-06	1.60785	2.16452e-05
SX-1	0.623769	8.03027e-06	1.60743	1.59629e-05		-0.173388	0.296612		-0.270907	0.429093
Mo-H8	0.623882	9.06391e-06	1.60788	2.1224e-05
SX-1	0.623798	9.28408e-06	1.6076	2.01978e-05		-0.172787	0.297213		-0.226322	0.473678
Mo-H8	0.62393	1.14642e-05	1.60805	3.20797e-05
SX-1	0.623792	8.27557e-06	1.60755	2.38974e-05		-0.190069	0.279931		-0.269335	0.430665
Mo-H8	0.623891	9.12774e-06	1.60791	1.53199e-05
SX-1	0.623775	7.77958e-06	1.60752	1.70279e-05		-0.190868	0.279132		-0.258739	0.441261
Mo-H8	0.623898	9.3308e-06	1.60796	1.99082e-05
SX-1	0.623789	8.7215e-06	1.60756	1.86408e-05		-0.17779	0.29221		-0.239082	0.460918
Mo-H8	0.623903	7.84481e-06	1.60793	1.54251e-05
SX-1	0.623756	8.89109e-06	1.60743	1.74604e-05		-0.241815	0.228185		-0.336941	0.363059
Mo-H8	0.623912	8.38791e-06	1.60801	2.00751e-05
SX-1	0.623805	1.01665e-05	1.60762	2.72003e-05		-0.176716	0.293284		-0.246046	0.453954
Mo-H8	0.62392	8.31429e-06	1.60802	1.81931e-05
SX-1	0.623813	7.8135e-06	1.60764	1.82403e-05		-0.182224	0.287776		-0.253638	0.446362
Mo-H8	0.623933	8.79826e-06	1.60807	2.05504e-05
SX-1	0.623792	8.83329e-06	1.60749	2.23333e-05		-0.226858	0.243142		-0.3554	0.3446
Mo-H8	0.623934	8.4866e-06	1.60805	1.63382e-05
SX-1	0.623816	9.4783e-06	1.60768	1.6979e-05		-0.174057	0.295943		-0.227849	0.472151
Mo-H8	0.623915	8.96449e-06	1.60804	2.00816e-05
SX-1	0.623842	7.84794e-06	1.60773	1.95308e-05		-0.132718	0.337282		-0.204368	0.495632
Mo-H8	0.623935	8.83171e-06	1.60807	1.6531e-05
SX-1	0.623815	9.9134e-06	1.60768	2.09786e-05		-0.210115	0.259885		-0.276066	0.423934
Mo-H8	0.623958	8.5347e-06	1.60816	1.78282e-05
SX-1	0.623834	8.27858e-06	1.60775	2.10647e-05		-0.187625	0.282375		-0.231648	0.468352
Mo-H8	0.623944	7.29538e-06	1.60808	1.84304e-05
Mo-H8	0.625491	2.55853e-05	1.61421	5.81895e-05
SX-1	0.625385	7.40762e-06	1.61382	1.66636e-05		-0.157033	0.312967		-0.250885	0.449115
Mo-H8	0.625476	8.27766e-06	1.61423	1.85068e-05
SX-1	0.625379	8.15712e-06	1.61374	1.78568e-05		-0.185992	0.284008		-0.313641	0.386359
Mo-H8	0.625514	7.886e-06	1.61426	1.72185e-05
SX-1	0.625391	7.66702e-06	1.61381	1.37156e-05		-0.173773	0.296227		-0.255653	0.444347
Mo-H8	0.625485	9.06324e-06	1.61419	1.86681e-05
SX-1	0.625376	6.92841e-06	1.61378	2.02216e-05		-0.160407	0.309593		-0.256083	0.443917
Mo-H8	0.625467	8.7661e-06	1.61419	1.7639e-05
SX-1	0.625306	7.55727e-06	1.61349	1.60019e-05		-0.236718	0.233282		-0.372448	0.327552
Mo-H8	0.625441	8.29972e-06	1.614	1.89692e-05
SX-1	0.625332	7.16261e-06	1.61355	1.46746e-05		-0.167435	0.302565		-0.27443	0.42557
Mo-H8	0.625434	7.55547e-06	1.61399	1.76321e-05
SX-1	0.625309	7.65228e-06	1.6135	1.88278e-05		-0.192245	0.277755		-0.319122	0.380878
Mo-H8	0.625424	9.05781e-06	1.61405	1.89297e-05
							0.268742	0.0884546		0.408127	0.128886
Mo-H8	0.623952	8.28306e-06	1.60819	1.78215e-05
SX-2	0.623884	9.55904e-06	1.6078	1.90031e-05		-0.10735	0.36265		-0.21794	0.48206
Mo-H8	0.62395	8.04818e-06	1.60811	2.16176e-05
SX-2	0.623859	9.07489e-06	1.60779	2.12907e-05		-0.146959	0.323041		-0.208958	0.491042
Mo-H8	0.623951	7.83394e-06	1.60815	1.69572e-05
SX-2	0.6238	7.25418e-06	1.60764	1.91089e-05		-0.293213	0.176787		-0.39044	0.30956
Mo-H8	0.624015	1.1084e-05	1.60839	3.25399e-05
SX-2	0.623819	7.46334e-06	1.60767	1.48185e-05		-0.240948	0.229052		-0.332925	0.367075
Mo-H8	0.623925	8.42467e-06	1.60801	1.92561e-05
SX-2	0.623832	7.27705e-06	1.60769	1.74415e-05		-0.157382	0.312618		-0.223401	0.476599
Mo-H8	0.623935	8.13094e-06	1.6081	1.79774e-05
SX-2	0.62381	7.82322e-06	1.6076	1.84216e-05		-0.256008	0.213992		-0.39078	0.30922
Mo-H8	0.624004	1.08024e-05	1.60836	2.33996e-05
SX-2	0.623825	8.14462e-06	1.60769	1.68151e-05		-0.245287	0.224713		-0.350994	0.349006
Mo-H8	0.623953	8.25977e-06	1.60814	1.62167e-05
SX-2	0.62379	7.59272e-06	1.60751	1.69035e-05		-0.268744	0.201256		-0.397751	0.302249
Mo-H8	0.623962	7.27118e-06	1.60817	1.95231e-05
SX-2	0.623792	8.95121e-06	1.60758	2.10103e-05		-0.270082	0.199918		-0.380599	0.319401
Mo-H8	0.62396	8.36429e-06	1.60823	1.88267e-05
SX-2	0.623819	7.60241e-06	1.60762	1.84427e-05		-0.223229	0.246771		-0.3638	0.3362
Mo-H8	0.623957	9.0639e-06	1.60818	1.90273e-05
SX-2	0.623803	7.66257e-06	1.60763	1.58296e-05		-0.260773	0.209227		-0.350818	0.349182
Mo-H8	0.623976	8.10894e-06	1.60821	1.68323e-05
SX-2	0.623817	8.82587e-06	1.60766	2.57662e-05		-0.254712	0.215288		-0.353221	0.346779
Mo-H8	0.623976	9.50118e-06	1.60825	1.79213e-05
SX-2	0.623805	6.94083e-06	1.60758	1.88241e-05		-0.244432	0.225568		-0.383227	0.316773
Mo-H8	0.623938	9.40993e-06	1.60814	1.74926e-05
SX-2	0.623807	7.85589e-06	1.60766	2.30015e-05		-0.204846	0.265154		-0.282604	0.417396
Mo-H8	0.623931	8.04729e-06	1.6081	1.8923e-05
SX-2	0.623835	1.1695e-05	1.60771	3.04679e-05		-0.171215	0.298785		-0.266389	0.433611
Mo-H8	0.623952	8.77779e-06	1.60818	1.88438e-05
SX-2	0.623815	1.16454e-05	1.60765	3.09583e-05		-0.200812	0.269188		-0.312649	0.387351
Mo-H8	0.62393	7.57154e-06	1.60813	1.81352e-05
SX-2	0.623814	1.02209e-05	1.60765	2.40022e-05		-0.197953	0.272047		-0.298956	0.401044
Mo-H8	0.623944	7.70779e-06	1.60814	1.99523e-05
SX-2	0.623837	5.91374e-06	1.60771	1.59602e-05		-0.182036	0.287964		-0.27122	0.42878
Mo-H8	0.623957	8.06278e-06	1.60815	1.65023e-05
SX-2	0.623878	8.99826e-06	1.60782	2.03561e-05		-0.137212	0.332788		-0.222948	0.477052
Mo-H8	0.62397	8.49489e-06	1.6082	2.17131e-05
SX-2	0.623857	8.65463e-06	1.60777	1.91193e-05		-0.160783	0.309217		-0.248132	0.451868
Mo-H8	0.623945	8.04306e-06	1.60814	1.95223e-05
SX-2	0.623817	7.08899e-06	1.60762	1.53553e-05		-0.222619	0.247381		-0.346497	0.353503
Mo-H8	0.623966	8.46949e-06	1.60822	1.85592e-05
							0.258257	0.101863		0.385988	0.128488
Mo-H8	0.624064	9.92931e-06	1.60853	2.01637e-05
SX-3	0.623987	9.61071e-06	1.60823	1.74386e-05		-0.115241	0.354759		-0.174052	0.525948
Mo-H8	0.624054	9.3586e-06	1.60849	1.90427e-05
SX-3	0.623927	9.31911e-06	1.60802	1.95521e-05		-0.190797	0.279203		-0.284349	0.415651
Mo-H8	0.624039	8.1427e-06	1.60847	2.03022e-05
SX-3	0.62393	7.70399e-06	1.60798	1.56893e-05		-0.183599	0.286401		-0.302399	0.397601
Mo-H8	0.624051	8.32534e-06	1.60846	1.88686e-05
SX-3	0.623938	1.00992e-05	1.6081	2.26765e-05		-0.164327	0.305673		-0.214778	0.485222
Mo-H8	0.624031	8.65285e-06	1.60842	1.70202e-05
SX-3	0.623954	8.12697e-06	1.60813	2.30158e-05		-0.132222	0.337778		-0.186701	0.513299
Mo-H8	0.624043	9.83397e-06	1.60845	1.8589e-05
SX-3	0.623896	8.49649e-06	1.60788	1.8334e-05		-0.245897	0.224103		-0.374784	0.325216
Mo-H8	0.624057	9.31843e-06	1.60852	1.79501e-05
SX-3	0.623922	9.05192e-06	1.60797	2.34171e-05		-0.192382	0.277618		-0.30239	0.39761
Mo-H8	0.624027	9.21003e-06	1.6084	2.01389e-05
SX-3	0.623904	7.00264e-06	1.60791	1.85904e-05		-0.187881	0.282119		-0.308693	0.391307
Mo-H8	0.624016	9.26911e-06	1.60841	1.98094e-05
SX-3	0.62396	7.89843e-06	1.60816	1.74625e-05		-0.109804	0.360196		-0.176214	0.523786
Mo-H8	0.624042	8.5851e-06	1.60847	1.81284e-05
SX-3	0.623976	9.07657e-06	1.60818	1.96955e-05		-0.0962455	0.373754		-0.156905	0.543095
Mo-H8	0.62403	1.04135e-05	1.60839	1.98072e-05
SX-3	0.623928	8.33494e-06	1.608	1.6999e-05		-0.174479	0.295521		-0.260712	0.439288
Mo-H8	0.624044	9.37383e-06	1.60844	1.91978e-05
SX-3	0.623921	9.38472e-06	1.60804	2.19878e-05		-0.169192	0.300808		-0.226885	0.473115
Mo-H8	0.624009	8.50379e-06	1.60836	1.93698e-05
SX-3	0.623935	8.47673e-06	1.60806	1.7042e-05		-0.118735	0.351265		-0.180679	0.519321
Mo-H8	0.62401	1.05308e-05	1.60833	1.90919e-05
SX-3	0.623905	8.86658e-06	1.60797	2.04816e-05		-0.165681	0.304319		-0.232971	0.467029
Mo-H8	0.624006	9.8002e-06	1.60835	1.93088e-05
SX-3	0.623939	8.72678e-06	1.60806	1.65143e-05		-0.0965502	0.37345		-0.167868	0.532132
Mo-H8	0.623991	9.13942e-06	1.60831	1.7953e-05
SX-3	0.623902	8.84513e-06	1.60785	1.93534e-05		-0.162588	0.307412		-0.284525	0.415475
Mo-H8	0.624017	9.05668e-06	1.60831	1.83181e-05
							0.313399	0.0832099		0.460319	0.1294
Mo-H8	0.623967	8.42738e-06	1.60824	2.08472e-05
GX-1	0.624452	8.07938e-06	1.61006	1.81391e-05		0.782775	1.25277		1.15428	1.85428
Mo-H8	0.62396	1.03495e-05	1.60816	1.81687e-05
GX-1	0.624459	8.17969e-06	1.61002	2.02003e-05		0.809877	1.27988		1.17971	1.87971
Mo-H8	0.623947	8.74023e-06	1.60809	1.66447e-05
GX-1	0.624461	9.39732e-06	1.61009	2.41072e-05		0.809757	1.27976		1.21911	1.91911
Mo-H8	0.623965	8.86612e-06	1.60816	1.64839e-05
GX-1	0.624463	7.39188e-06	1.61009	1.7091e-05		0.796359	1.26636		1.17599	1.87599
Mo-H8	0.623967	9.26121e-06	1.60824	1.90558e-05
GX-1	0.624479	8.70146e-06	1.61009	1.88105e-05		0.848034	1.31803		1.20579	1.90579
Mo-H8	0.623932	8.60612e-06	1.60806	1.86152e-05
GX-1	0.62447	7.79377e-06	1.61009	1.66612e-05		0.843225	1.31323		1.22876	1.92876
Mo-H8	0.623956	1.01756e-05	1.60817	1.73011e-05
GX-1	0.624474	7.86262e-06	1.61017	1.93187e-05		0.840352	1.31035		1.25438	1.95438
Mo-H8	0.623945	9.04302e-06	1.60814	1.81366e-05
GX-1	0.624493	8.85734e-06	1.61018	2.03071e-05		0.90277	1.37277		1.31105	2.01105
Mo-H8	0.623915	9.35689e-06	1.60802	1.70966e-05
GX-1	0.624473	9.02475e-06	1.61012	1.94524e-05		0.867359	1.33736		1.28379	1.98379
Mo-H8	0.623949	9.54398e-06	1.60809	1.70053e-05
GX-1	0.624465	8.30659e-06	1.61009	1.79312e-05		0.833319	1.30332		1.23093	1.93093
Mo-H8	0.623942	8.644e-06	1.60814	1.70651e-05
GX-1	0.624454	8.22791e-06	1.6101	1.91501e-05		0.83889	1.30889		1.24912	1.94912
Mo-H8	0.623919	7.44267e-06	1.60805	1.68874e-05
GX-1	0.62448	8.95309e-06	1.61016	1.9326e-05		0.880573	1.35057		1.30798	2.00798
Mo-H8	0.623942	8.75555e-06	1.60806	1.65374e-05
GX-1	0.624442	9.7775e-06	1.61003	2.08396e-05		0.809488	1.27949		1.22191	1.92191
Mo-H8	0.623933	1.01582e-05	1.60808	1.78134e-05
GX-1	0.624478	8.10765e-06	1.61012	1.9432e-05		0.878796	1.3488		1.28208	1.98208
Mo-H8	0.623926	9.53675e-06	1.60805	2.02076e-05
GX-1	0.624463	7.98163e-06	1.61013	1.89946e-05		0.85559	1.32559		1.2837	1.9837
Mo-H8	0.623933	9.50829e-06	1.60808	1.98935e-05
GX-1	0.624456	9.79551e-06	1.61003	2.02263e-05		0.829264	1.29926		1.20038	1.90038
Mo-H8	0.623945	1.02871e-05	1.60812	1.85519e-05
GX-1	0.624473	7.96338e-06	1.6101	1.8582e-05		0.837589	1.30759		1.23182	1.93182
Mo-H8	0.623955	9.15288e-06	1.60812	1.82929e-05
GX-1	0.62446	9.12565e-06	1.61008	1.7362e-05		0.813998	1.284		1.21202	1.91202
Mo-H8	0.62395	8.65273e-06	1.60814	1.78439e-05
GX-1	0.624484	9.64797e-06	1.61014	1.89295e-05		0.866085	1.33609		1.27644	1.97644
Mo-H8	0.623937	8.56904e-06	1.60804	2.08753e-05
GX-1	0.624484	9.04297e-06	1.61011	1.91131e-05		0.867305	1.3373		1.26682	1.96682
Mo-H8	0.623948	1.07914e-05	1.60811	2.10295e-05
							1.31057	0.0621589		1.9388	0.08852
